# Supplementary material
Source: PubMed Central journal article supplement (PMC8261675)
Supplement: mmc1.pdf [file mmc1.pdf]

**Supplemental information**

**Multi-dimensional and longitudinal  
systems profiling reveals predictive  
pattern of severe COVID-19**

**Marcel S. Woo, Friedrich Haag, Axel Nierhaus, Dominik Jarczak, Kevin Roedl, Christina Mayer, Thomas T. Brehm, Marc van der Meirschen, Annette Hennigs, Maximilian Christopheit, Walter Fiedler, Panagiotis Karagiannis, Christoph Burdelski, Alexander Schultze, Samuel Huber, Marylyn M. Addo, Stefan Schmiedel, Manuel A. Friese, Stefan Kluge, and Julian Schulze zur Wiesch**

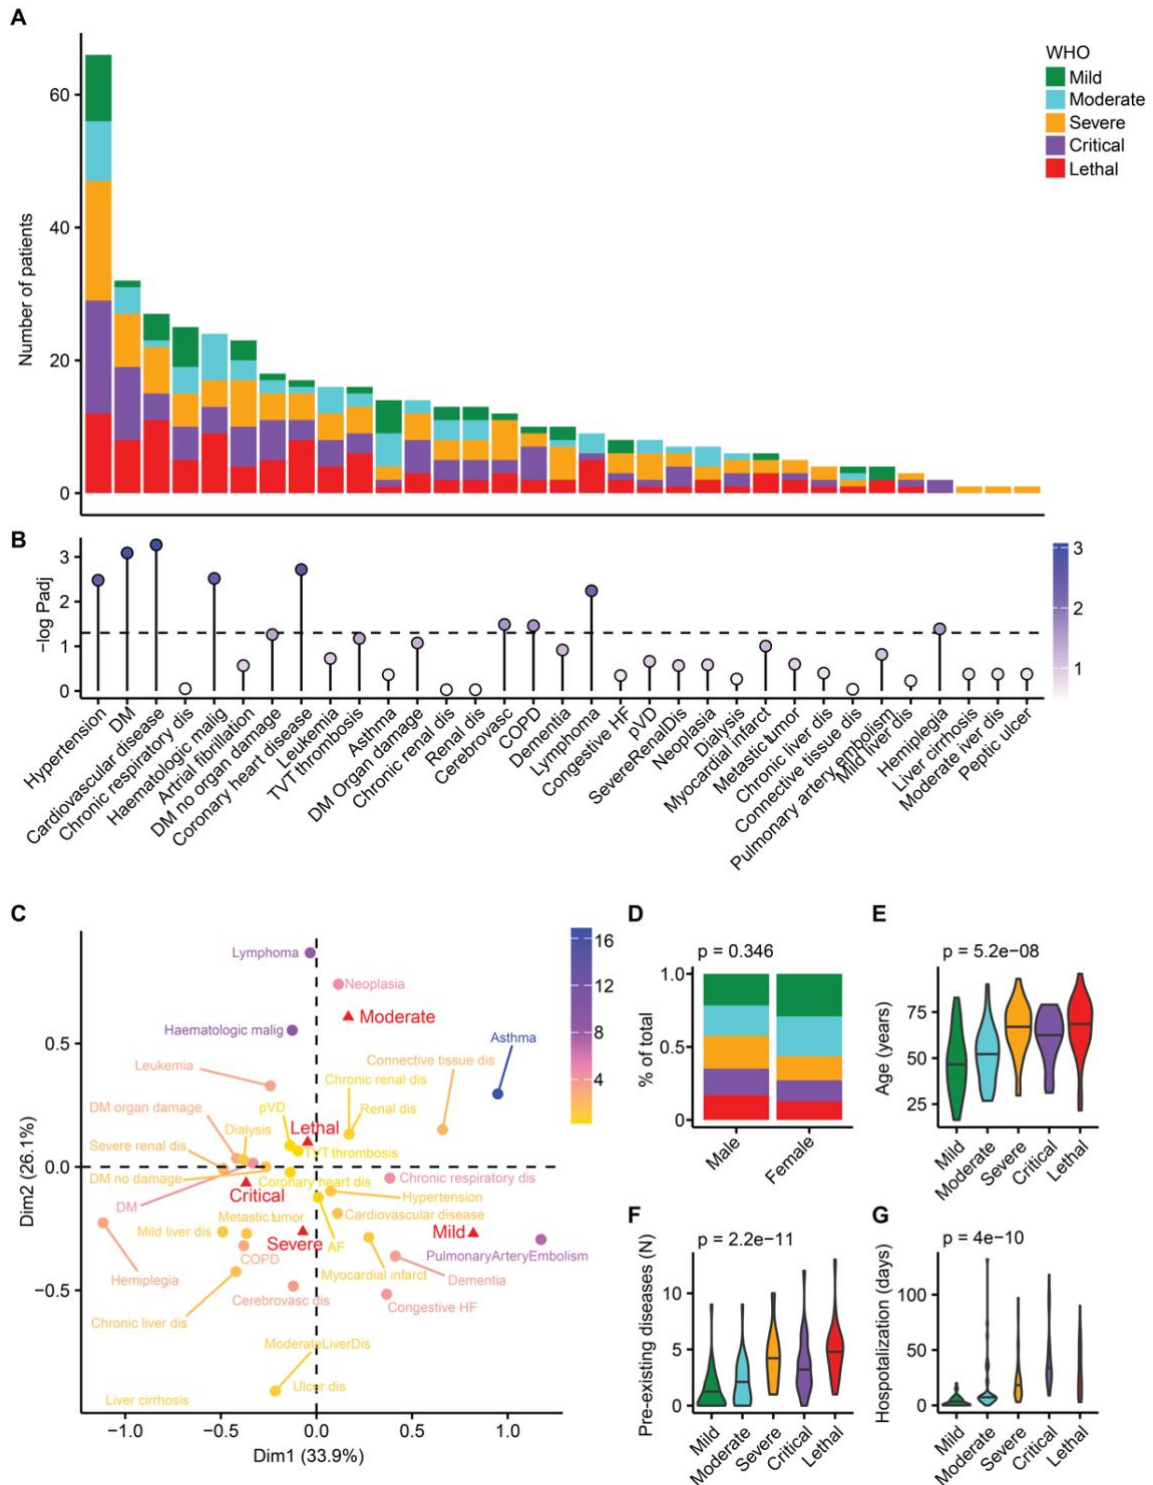

**Figure S1. Characteristics of our patient cohort, Related to Figure 1.**

(A) Number of patients and relative distribution of WHO disease severity with depicted preconditions.

(B) Negative adjusted log<sub>10</sub> P values of impact of respective precondition on WHO disease severity. Significance level of negative adjusted log<sub>10</sub> P = 0.05 is shown as dashed line. Color represents significance. Chi-square test was used.

(C) Correspondence analysis of chronic preconditions with WHO disease severities. Color shows contribution to non-uniform distribution. (D) Relative frequency of disease severities in male and female patients.

(E–G) Distribution of Age (E), number of chronic diseases (F) and hospitalization days (G) in patients with different disease severities. One-way-ANOVA was used for statistical significance. Data is represented as violin plots with median.

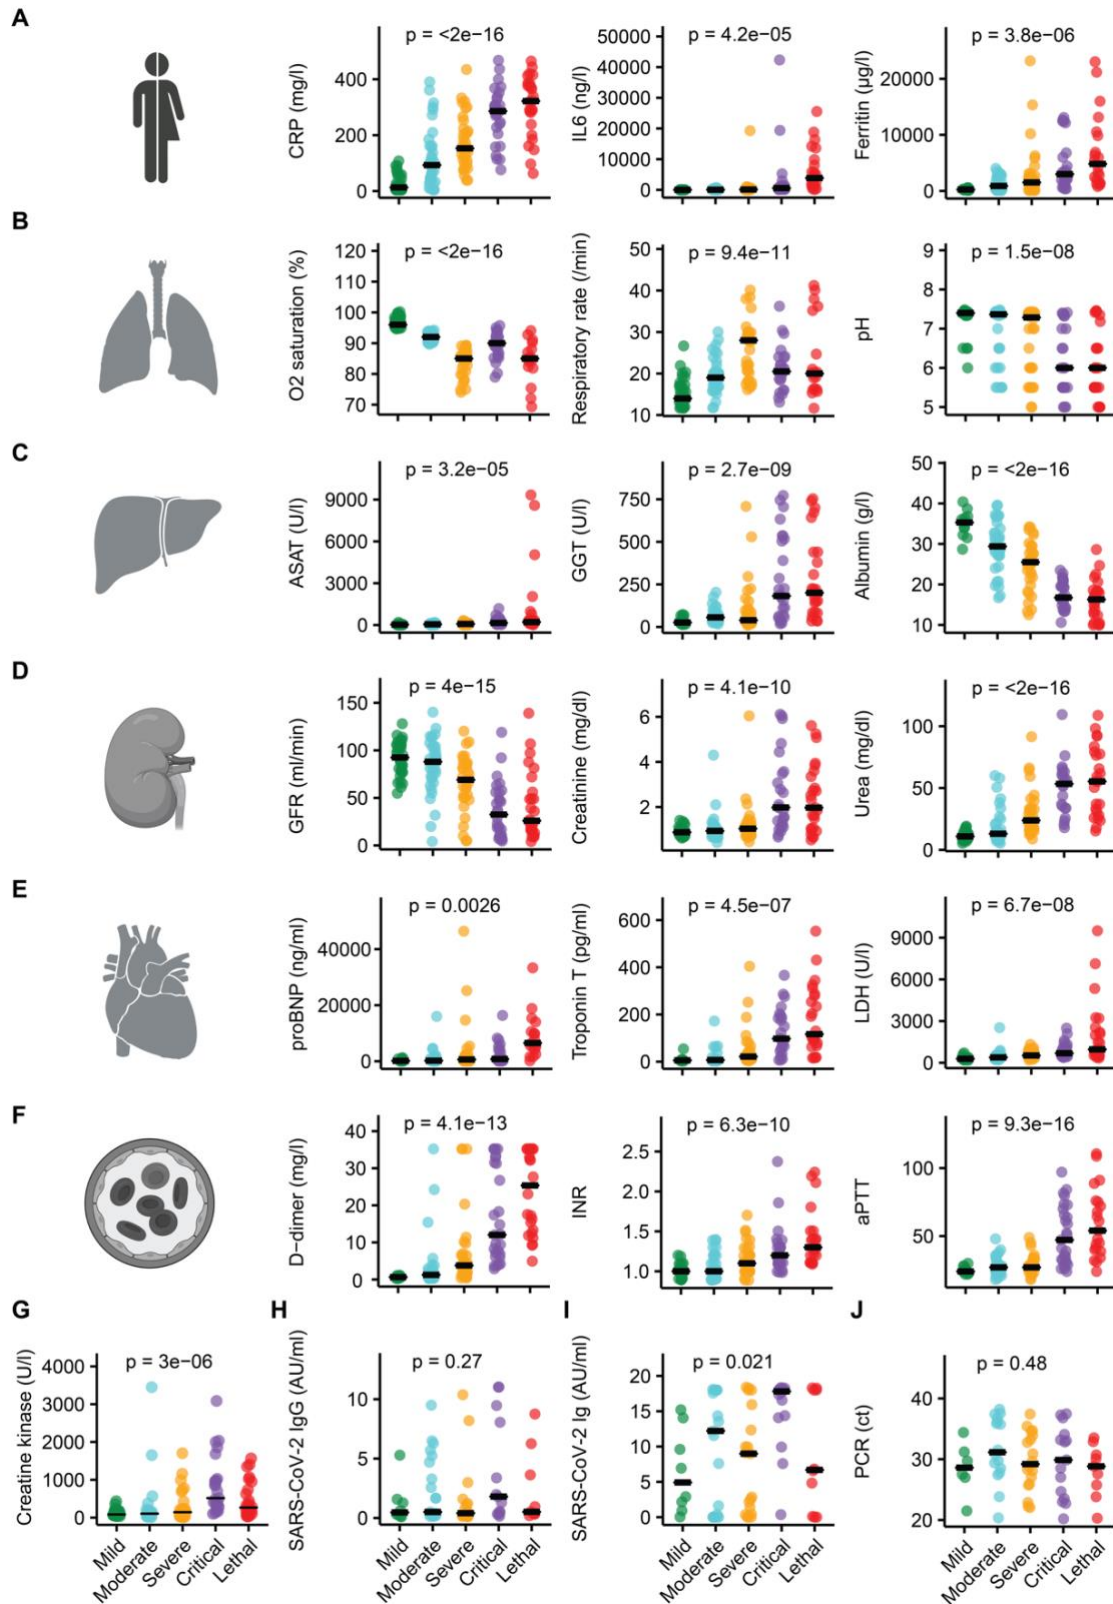

**Figure S2. Laboratory markers in COVID-19, Related to Figure 2.**

(A–G) Analysis of parameters indicative of inflammation (A) and dysregulation of the respiratory (B), hepatobiliary (C), renal (D), cardiac (E), coagulative (F), and musculoskeletal (G) systems.

(H–J) Analysis of SARS-CoV-2 IgG by Euroimmun test (H), SARS-CoV-2 Ig by Wantei test (I) and PCR ct value (J) of patients with mild, moderate, severe, critical and lethal COVID-19. One-way-ANOVA was used to test statistical significance. Exact n is provided in Table S4. Exact P values are provided in the figure. Individual data points and median are shown.

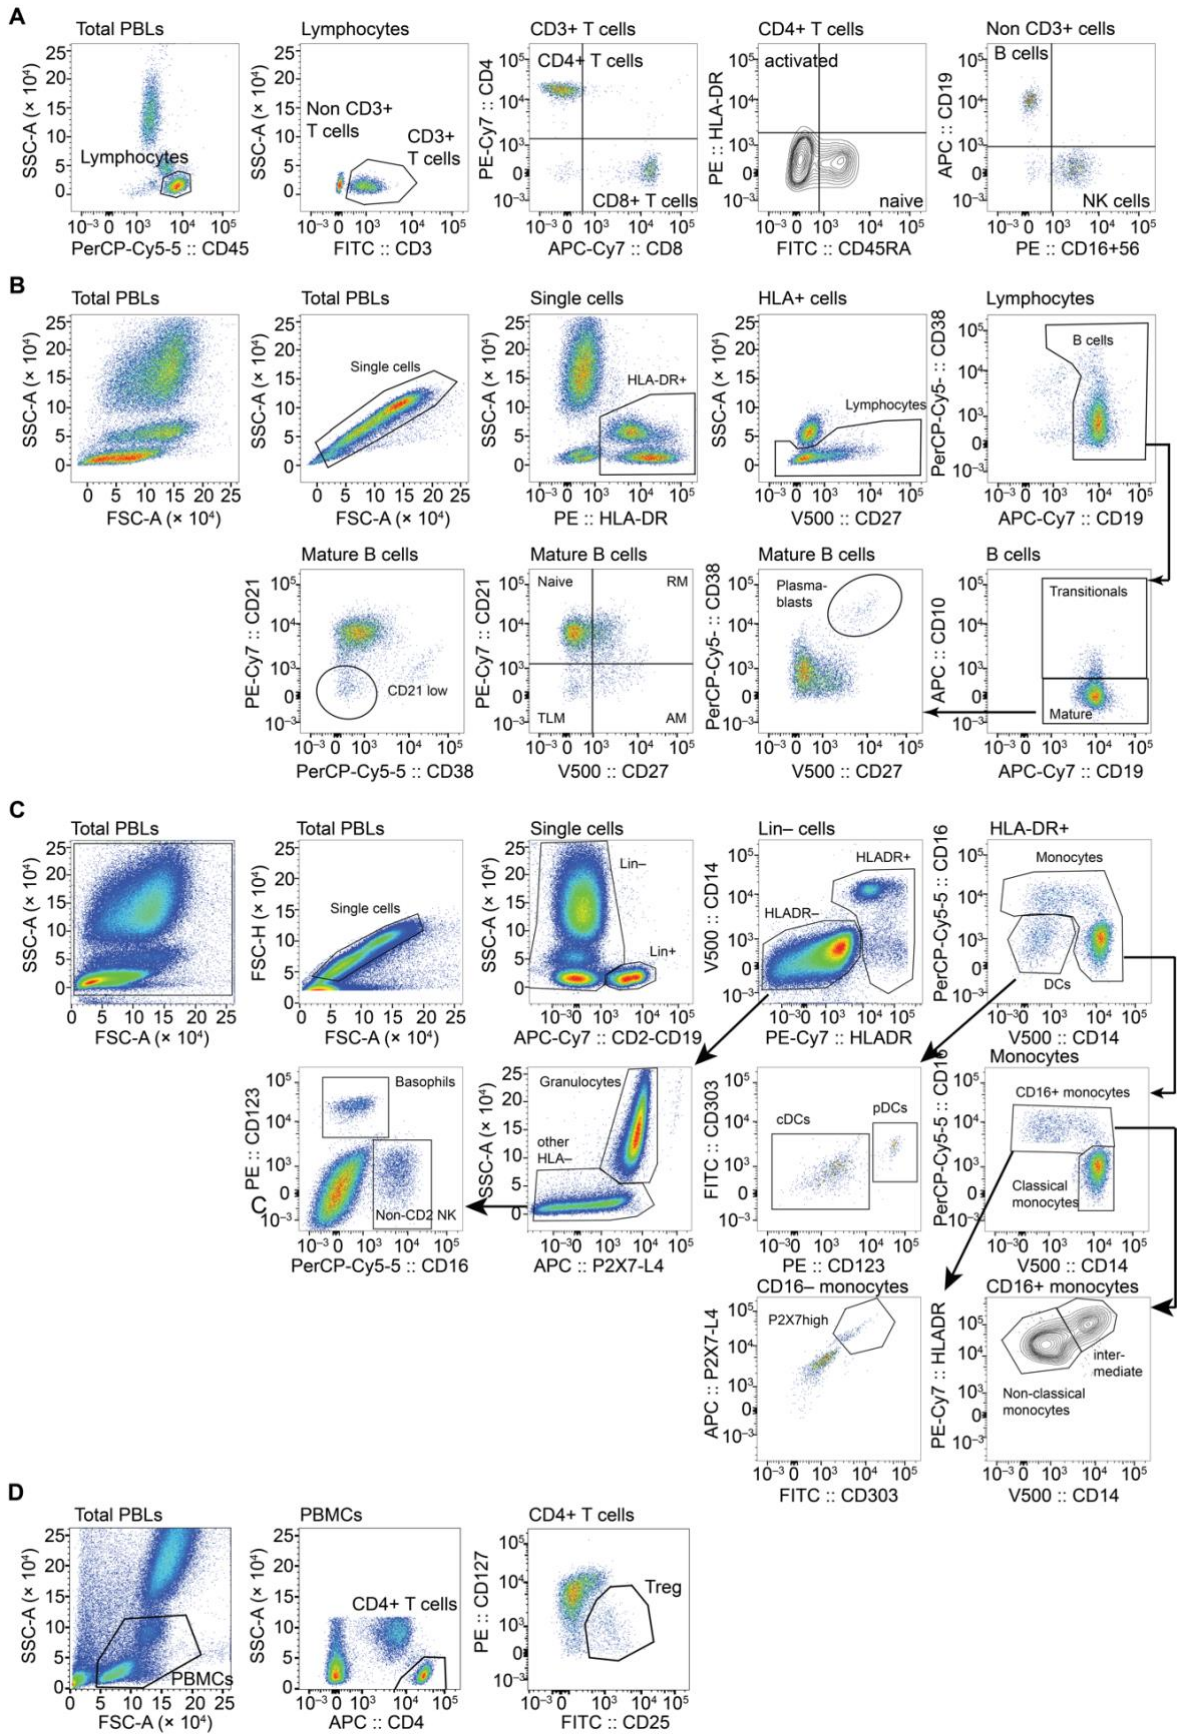

**Figure S3. Gating strategies, Related to all Figure including immune cell phenotyping.** (A–D) Gating strategies of lymphocytic (A), B cell (B) and myeloid subsets (C) and regulatory T cells (D). Used antibodies are provided in Table S6.



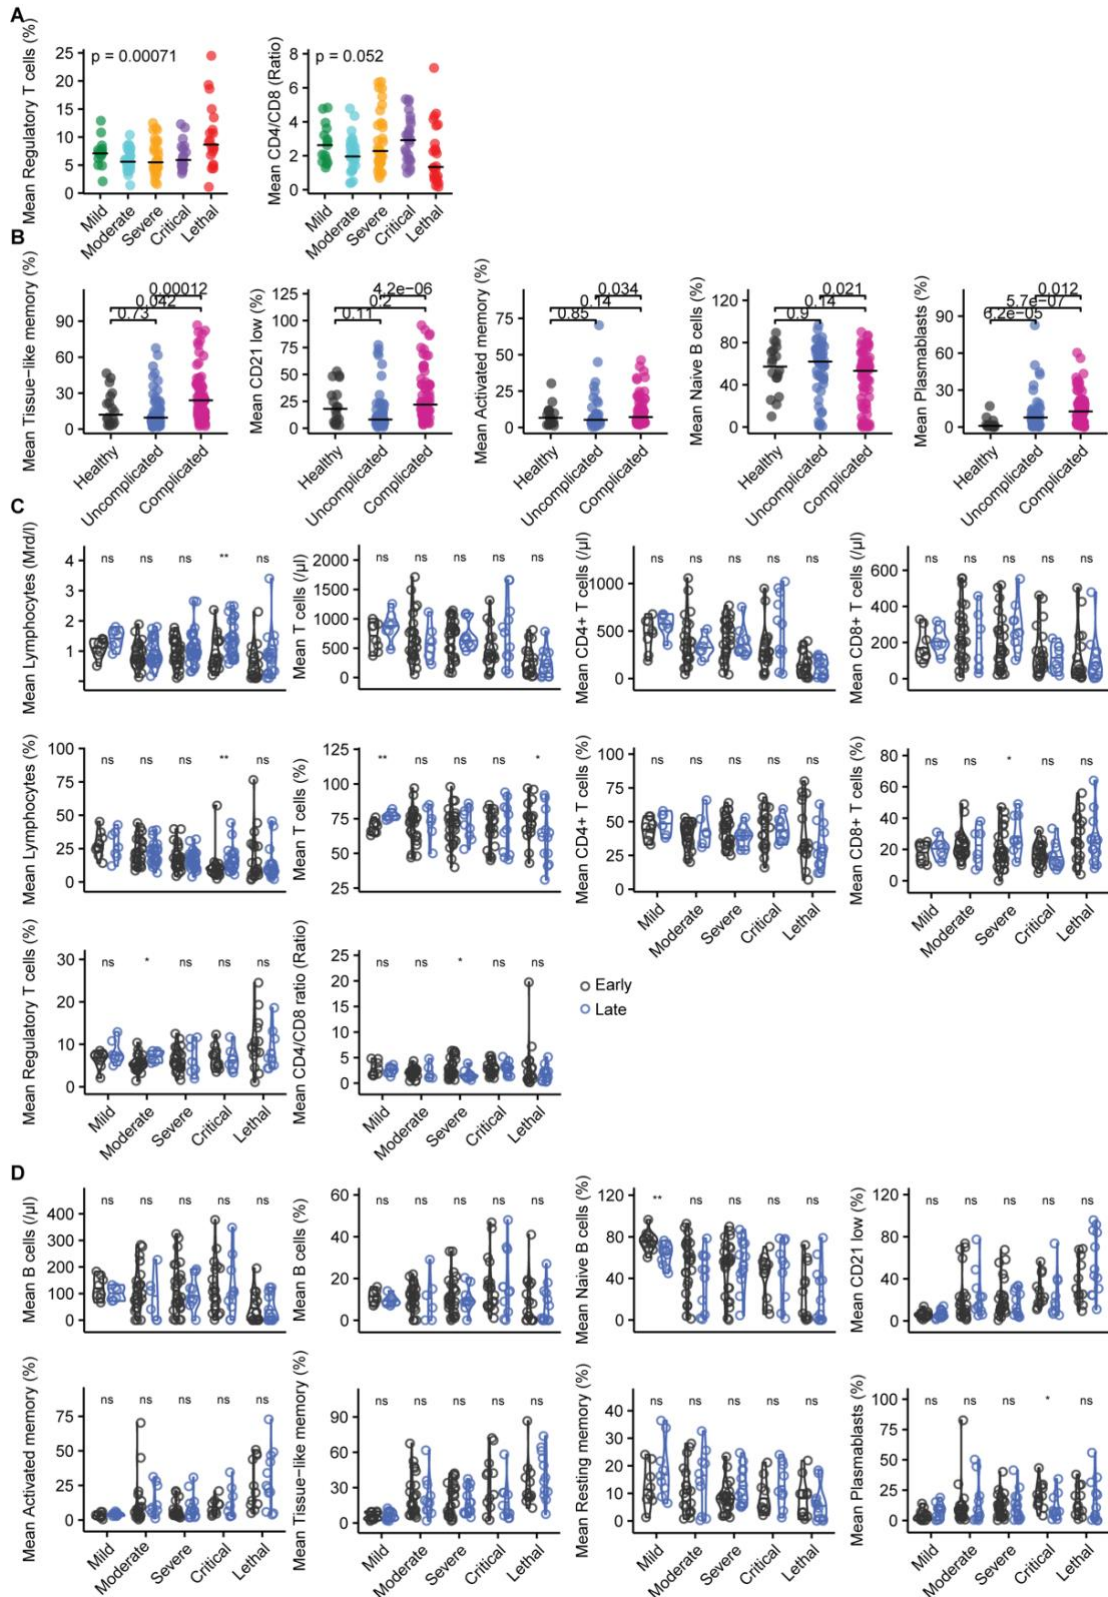

**Figure S4. Lymphocyte populations in early and late COVID-19, Related to Figure 4.**

(A) Frequency of regulatory T cells and CD4/CD8 ratio across all disease severity classes. One-way-ANOVA was used.

(B) Frequency of the indicated B cell populations in healthy donors and patients with uncomplicated and complicated COVID-19. Exact P values are shown in figure.

(C and D) Comparison of the indicated T cell (C) and B cell (D) populations between early and late COVID-19. Data is shown as violin plot with median. Exact n is provided in Table S4. Significance was calculated by FDR-adjusted Wilcoxon-test. Significant results are indicated by \*  $P < 0.05$ , \*\*  $P < 0.01$ .

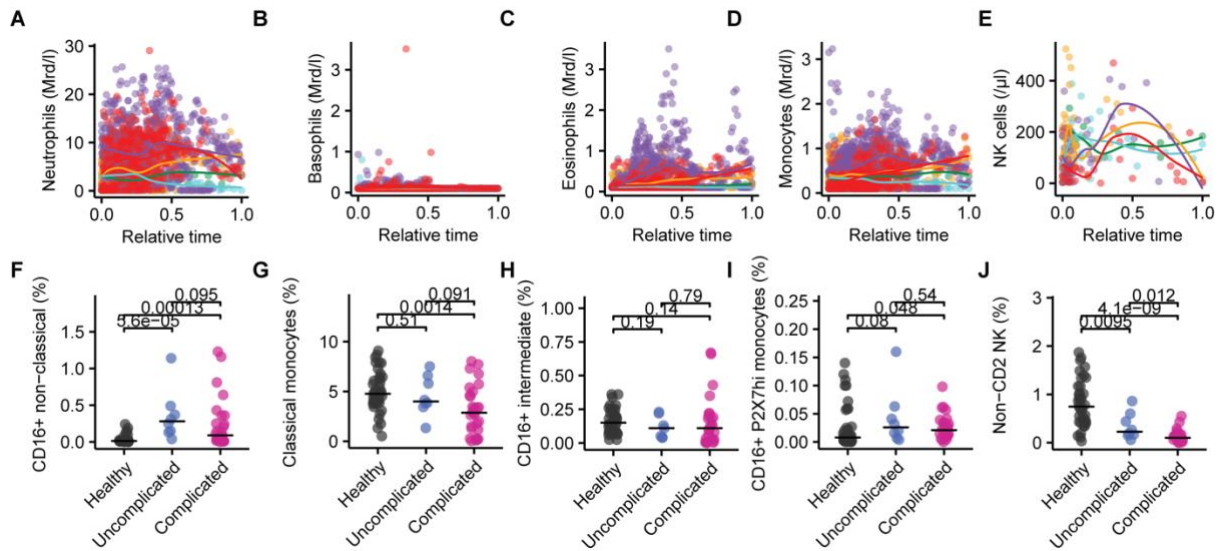

**Figure S5. Innate immune subpopulations in COVID-19, Related to Figure 5.**

(A–D) Frequency of total monocytes of CD16+ non-classical (A), classical (B), CD16+ intermediate (C), CD16+P2X7<sup>high</sup> (D) monocytes from healthy donors and patients with uncomplicated and complicated COVID-19, shown as percentage of total peripheral blood leucocytes.

(E) Frequency of non-CD2 NK cells of total NK cells from healthy donors and patients with uncomplicated and complicated COVID-19, shown as percentage of total peripheral blood leucocytes. Exact n is provided in Table S4. Significance was calculated by FDR-adjusted Wilcoxon-test. Significant results are indicated by \*  $P < 0.05$ , \*\*  $P < 0.01$ .

(F–J) Time course of the absolute counts from all COVID-19 patients of basophils (F), eosinophils (G), monocytes (H), neutrophils (I) and NK cells (J). Trend line for each WHO severity is depicted in respective color.

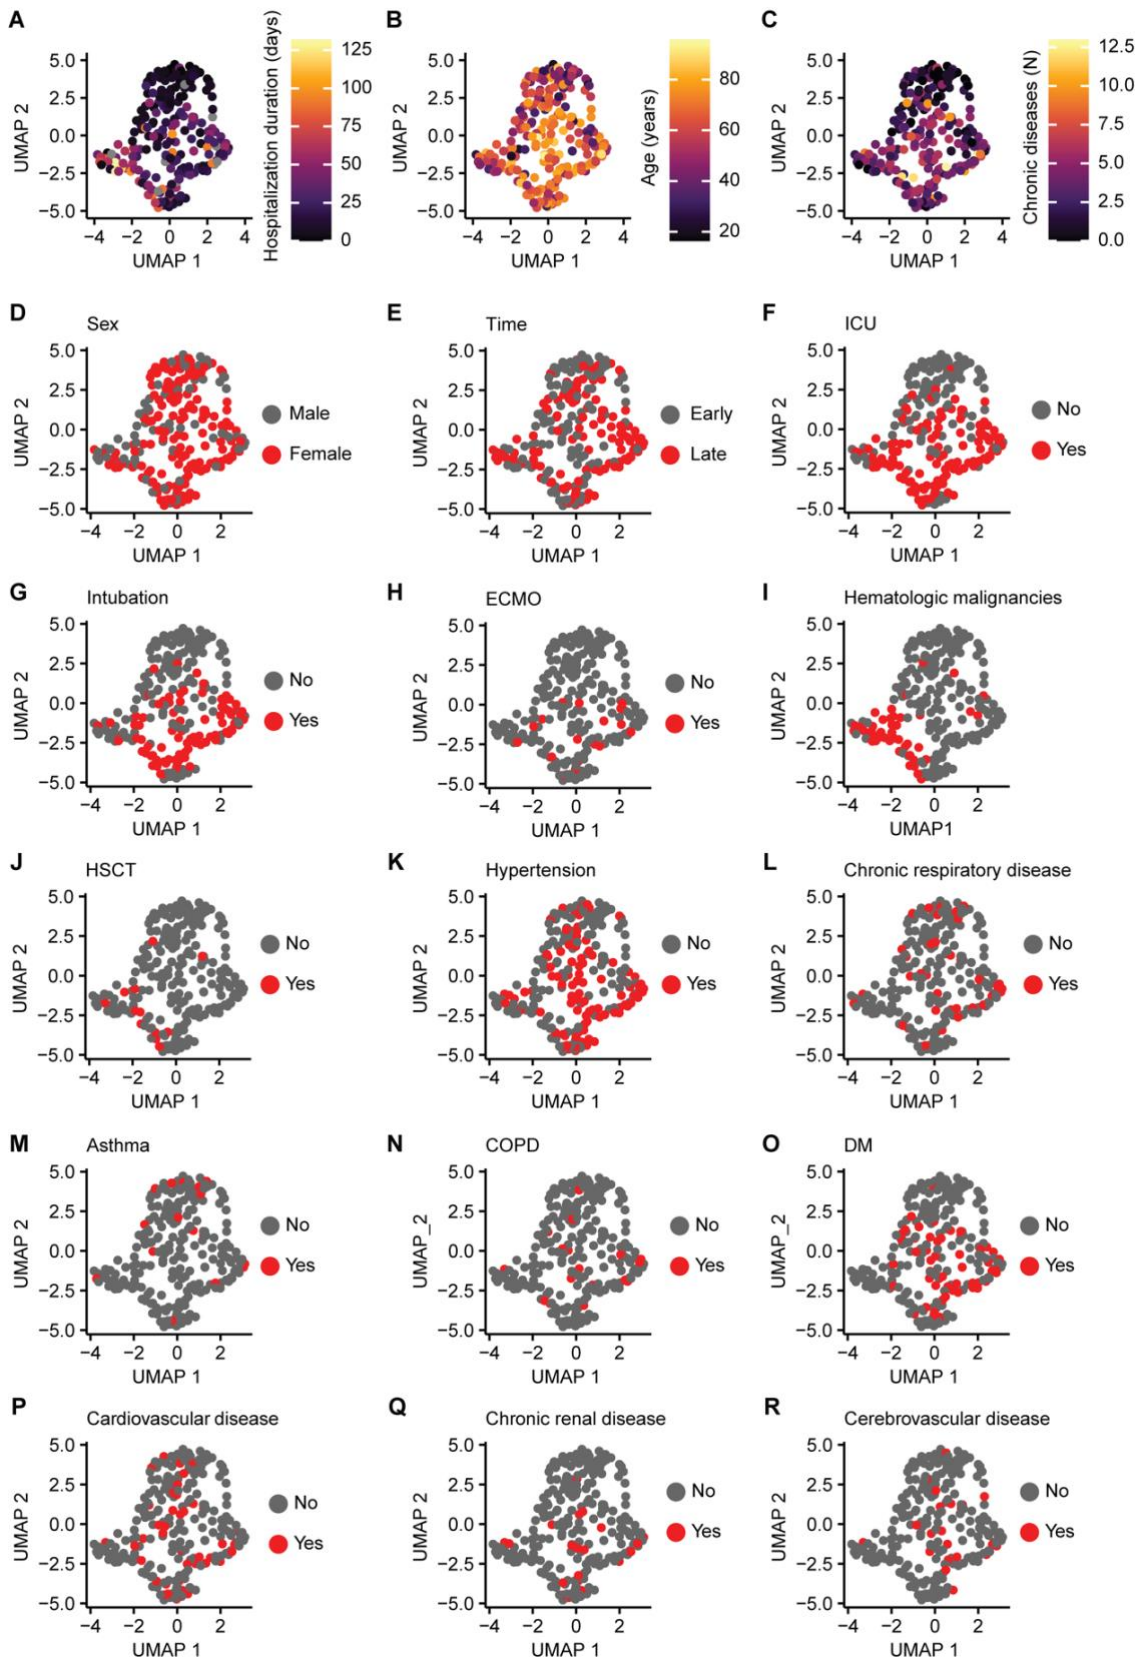

**Figure S6. Patient distribution in unbiased clustering, Related to Figure 6.**

(A–R) Representation of hospital duration (A), age (B), number of chronic diseases (C), sex (D), early or late timepoint (E), ICU admission (F), intubation (G), ECMO (H), hematologic malignancies (I), hematopoietic stem cell transplantation (J), hypertension (K), chronic respiratory disease (L), asthma (M), chronic obstructive pulmonary disease (N), diabetes mellitus (O), cardiovascular diseases (P), chronic renal diseases (Q), cerebrovascular diseases (R) in UMAP clustering of COVID-19 patients.



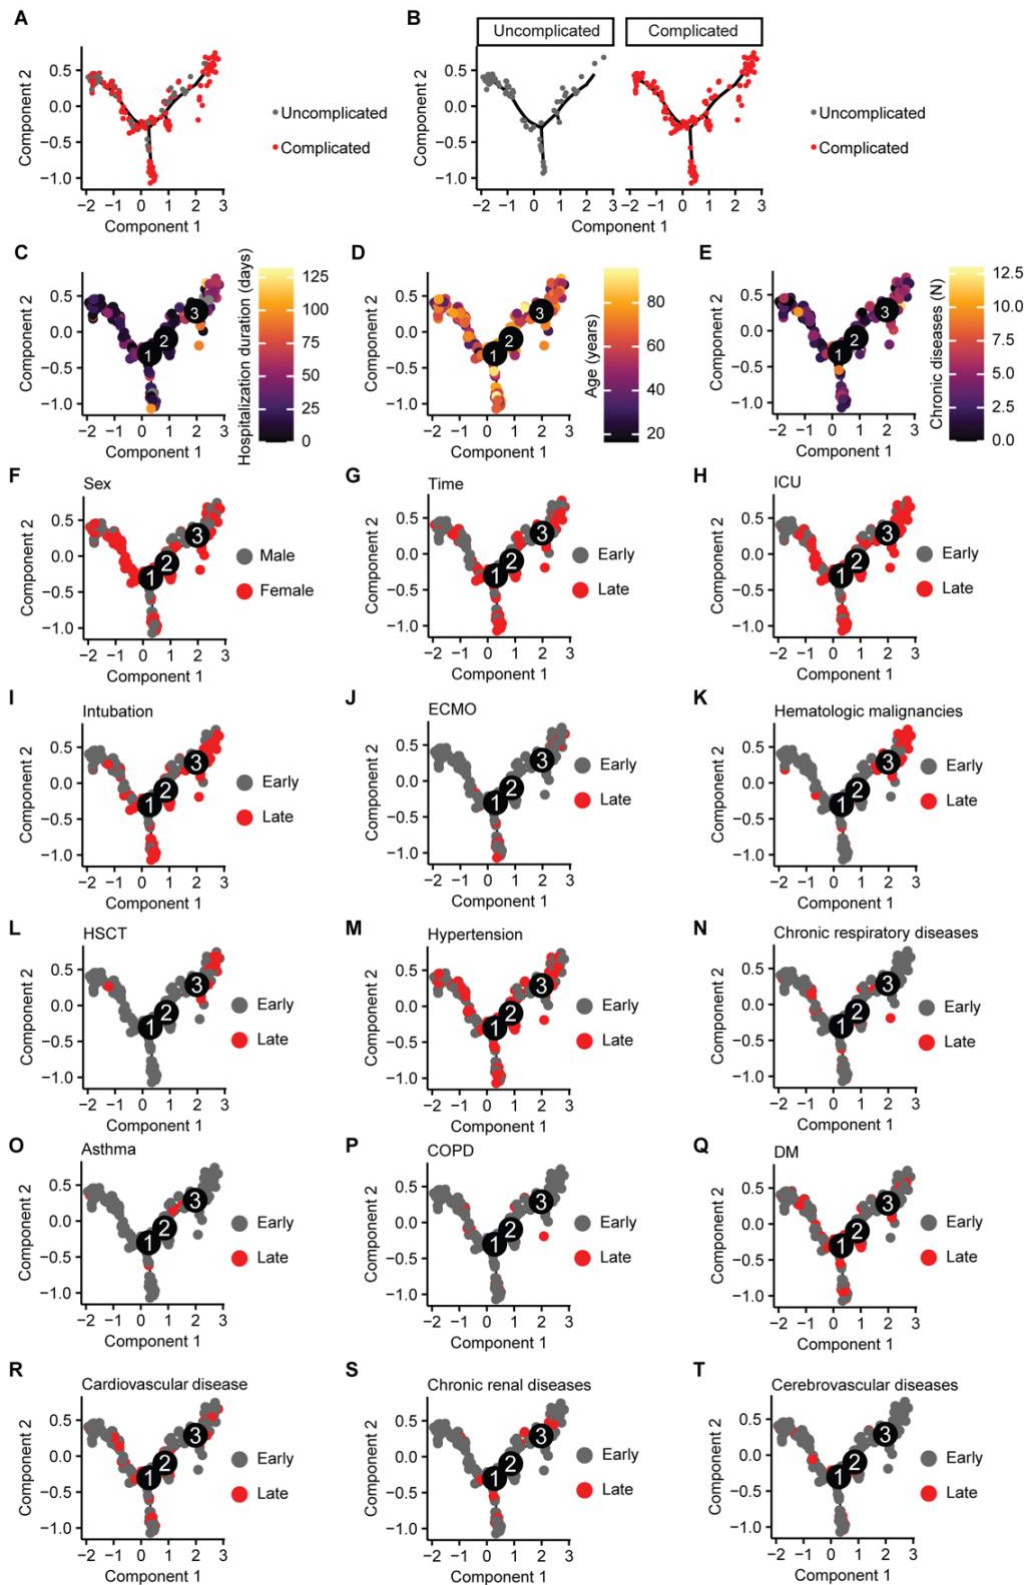

**Figure S7. Patient distribution in pseudo-time trajectory, Related to Figure 7.**

(A and B) Representation of uncomplicated and complicated disease courses in the pseudo-time trajectory.

(C–T) Representation of hospital duration (C), age (D), number of chronic diseases (E), sex (F), early or late timepoint (G), ICU admission (H), intubation (I), ECMO (J), hematologic malignancies (K), hematopoietic stem cell transplantation (L), hypertension (M), chronic respiratory disease (N), asthma (O), chronic obstructive pulmonary disease (P), diabetes mellitus (Q), cardiovascular diseases (R), chronic renal diseases (S), cerebrovascular diseases (T) in pseudo-time-trajectory of COVID-19 patients.



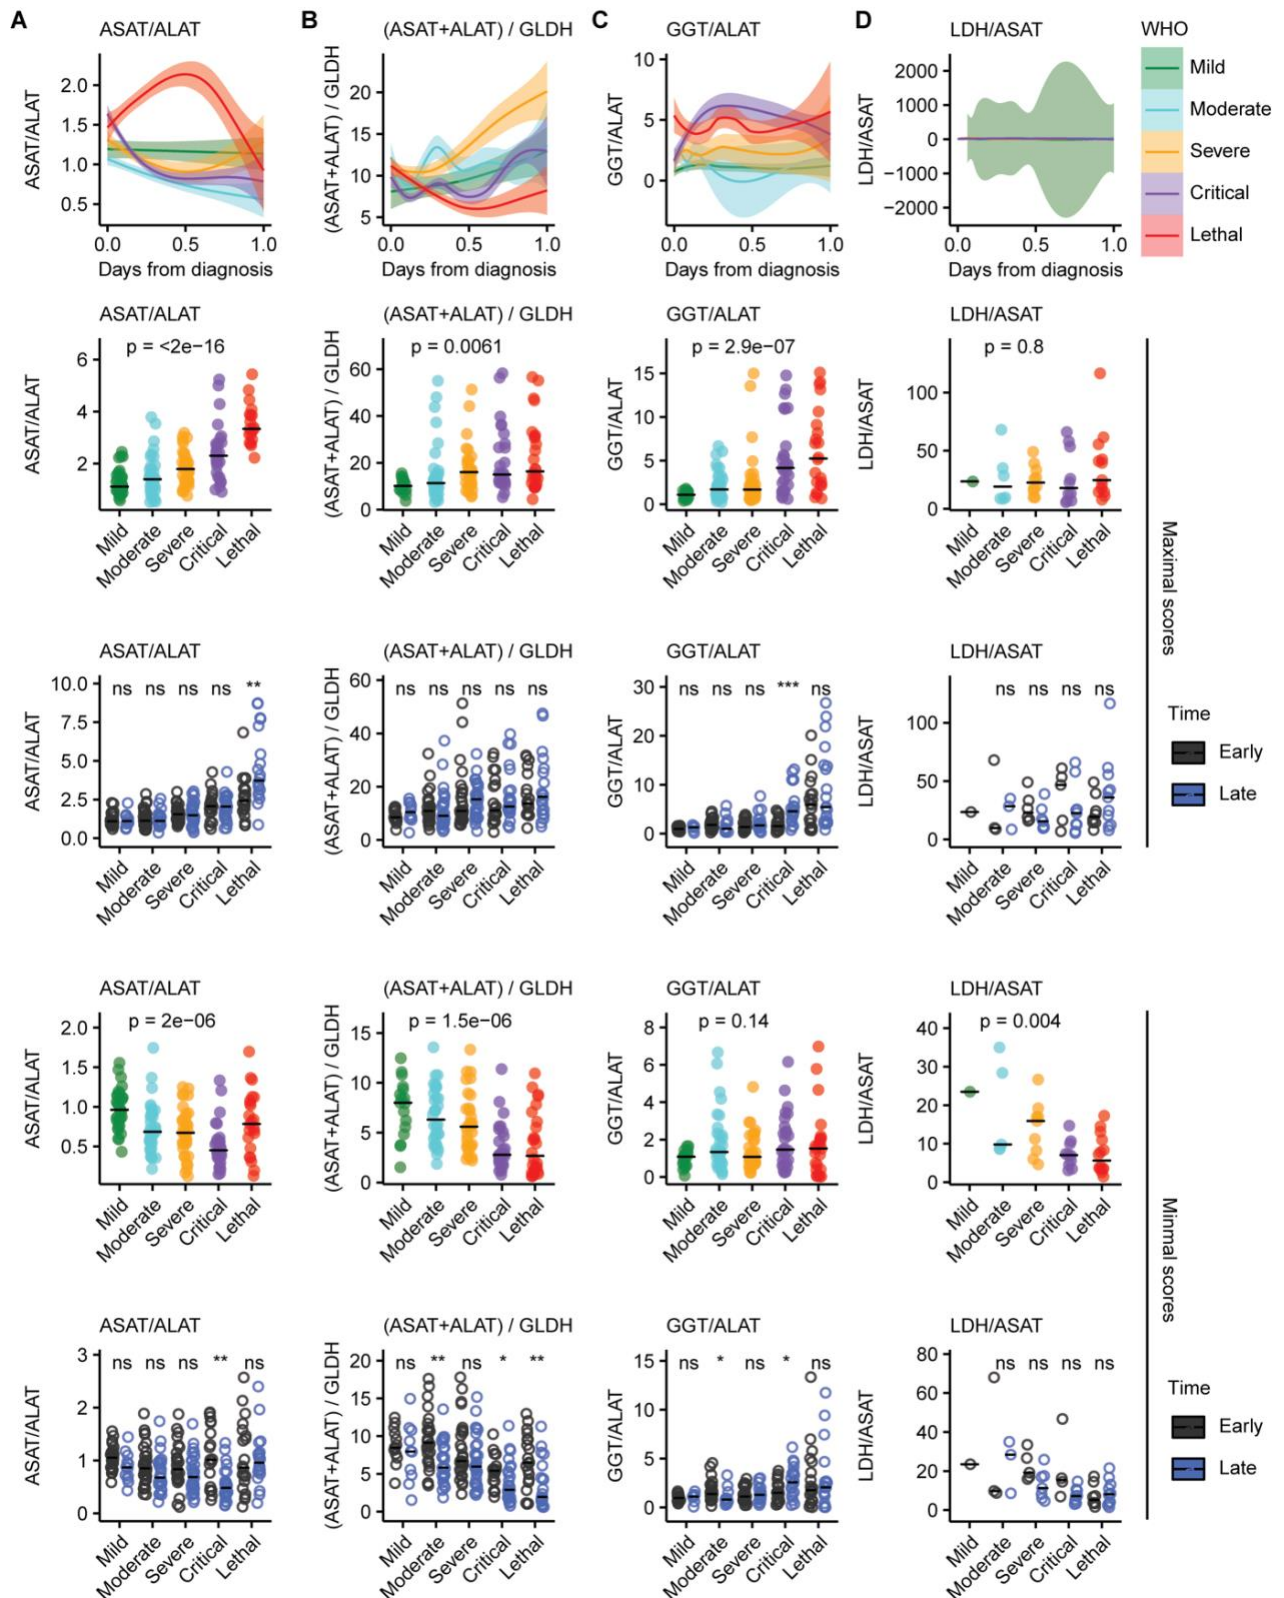

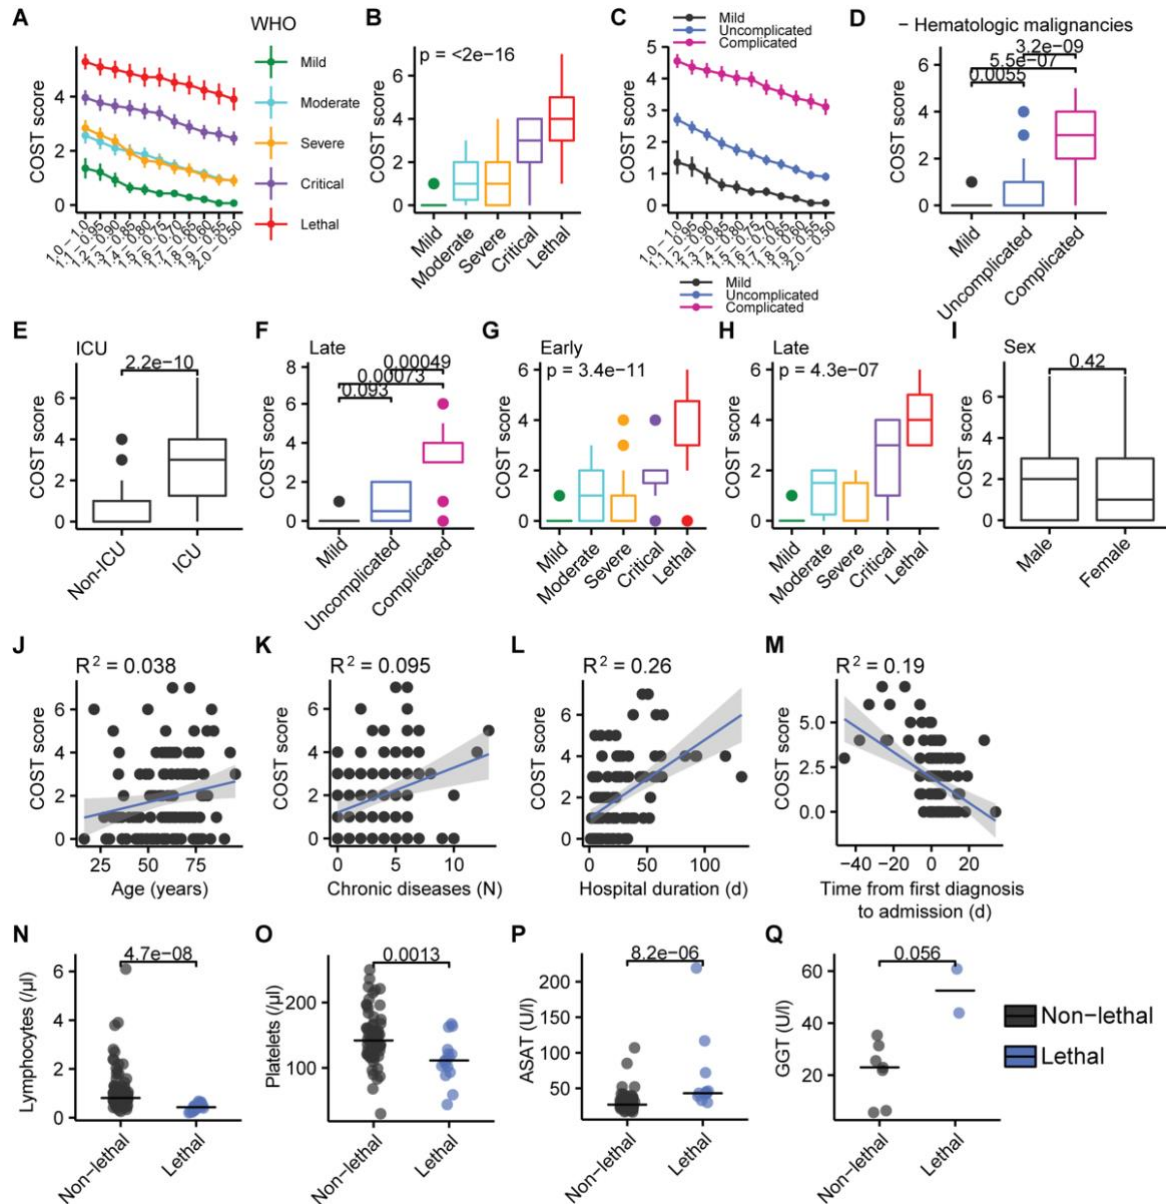

**Figure S9. Validation of COVID-19 disease severity (COST) score, Related to Figure 7.**

(A) COST score of COVID-19 patients with respective scaling factor for upper and lower limits.

(B) Score of patients with mild, moderate, severe, critical, lethal COVID-19. Significance was calculated by one-way-ANOVA.

(C) Frequency of patients with different disease severities for different scoring results.

(D) Score of patients without hematologic malignancies who suffered from mild, uncomplicated or complicated COVID-19. Significance was calculated by one-way-ANOVA.

(E) Comparison of the scores from patients with (n = 60) or without (n = 62) admission to ICU.

(F–H) Comparison of scores from early and late timepoints. Significance was calculated by one-way-ANOVA.

(I) Comparison of scores from male (n = 80) and female (n = 42) patients with COVID-19.

(J–M) Pearson correlation analysis of Score with patient age (J; n = 122), number of chronic diseases (K; n = 122), hospital duration (L; n = 122) and time from first diagnosis to admission (M; n = 122).

(N–Q) Lower quartile values of lymphocyte count (N) and platelets (O) and median of ASAT (P) and GGT (Q) from studies that exclusively included patients with non-lethal or lethal outcome. Data points from individual studies and median are shown. If not stated otherwise, boxplot with median, IQR and outliers are displayed, and significance was calculated by FDR-adjusted Wilcoxon-test and exact n is provided in Table S4.

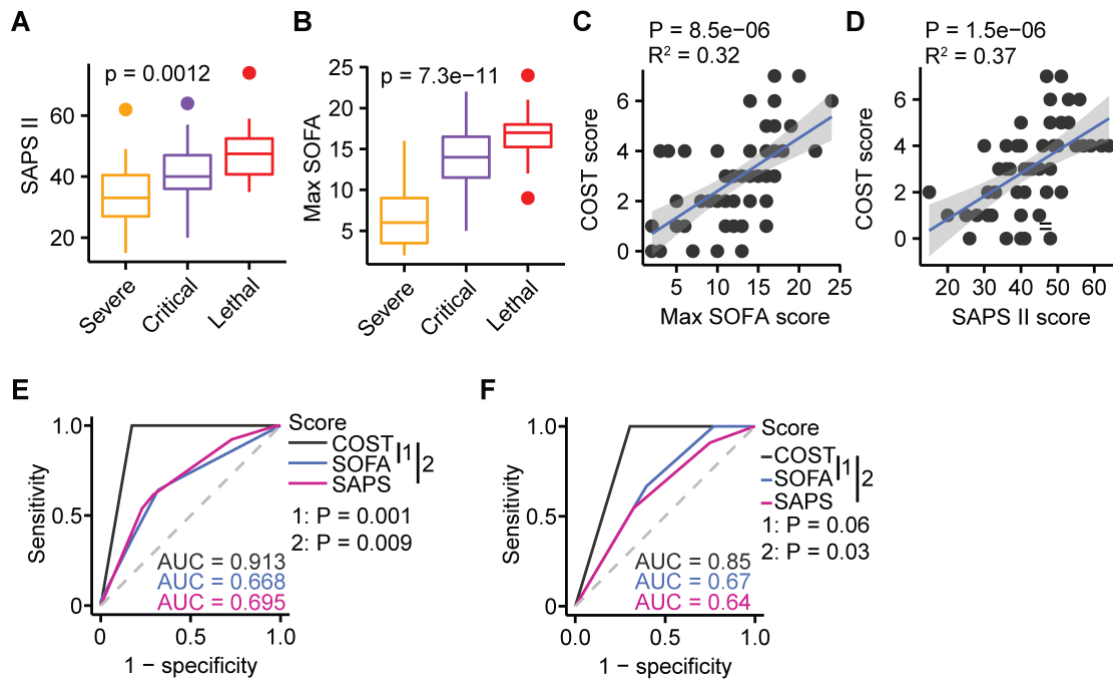

**Figure S10. Comparison of COST score with SOFA and SAPS scores, Related to Figure 7.**

(A and B) Maximal SAPS II (A) and SOFA (B) score of patients with severe, critical and lethal COVID-19. Data is shown as boxplot and significance was calculated by one-way-ANOVA.

(C and D) Pearson correlation analysis of COST and SOFA (T) or SAPSII (U) score ( $n = 61$ ).

(E) ROC analysis of maximal COST, SOFA and SAPS score from all timepoints ( $n = 61$ ).

(F) ROC analysis of COST, SOFA and SAPS score from first available timepoints ( $n = 61$ ).



|                                               | <b>N / Mean</b> | <b>Frequency (%) / SD</b> |
|-----------------------------------------------|-----------------|---------------------------|
| Sex (N / Frequency)                           |                 |                           |
| - Male                                        | 113             | 0.65                      |
| - Female                                      | 60              | 0.35                      |
| WHO (N / Frequency)                           |                 |                           |
| - Mild                                        | 48              | 0.28                      |
| - Moderate                                    | 37              | 0.21                      |
| - Severe                                      | 34              | 0.20                      |
| - Critical                                    | 28              | 0.16                      |
| - Lethal                                      | 26              | 0.15                      |
| Age (years; Mean / SD)                        | 57.33           | 17.00                     |
| Hospitalization (N / Frequency)               |                 |                           |
| - Inpatient                                   | 148             | 85.55                     |
| - ICU                                         | 70              | 40.46                     |
| - Transferal                                  | 27              | 15.61                     |
| - Outpatient                                  | 25              | 14.45                     |
| Hospitalization time (days; Mean / SD)        |                 |                           |
| - Total hospitalization                       | 22.07           | 26.71                     |
| - ICU stay                                    | 18.69           | 17.27                     |
| Chronic preconditions (Mean / SD)             | 2.90            | 2.61                      |
| Chronic preconditions (N / Frequency)         |                 |                           |
| - Chronic respiratory disease                 | 27              | 15.61                     |
| - Diabetes mellitus type 2, no organ damage   | 18              | 10.40                     |
| - Leukemia                                    | 16              | 9.25                      |
| - Diabetes mellitus type 2, with organ damage | 16              | 9.25                      |
| - Leukemia                                    | 16              | 9.25                      |
| - Cerebrovascular disease                     | 12              | 6.94                      |
| - Dementia                                    | 10              | 5.78                      |
| - Lymphoma                                    | 9               | 5.20                      |
| - Congestive heart failure                    | 8               | 4.62                      |
| - Peripheral venous disease                   | 8               | 4.62                      |
| - Neoplasia                                   | 8               | 4.62                      |
| - Severe renal disease                        | 7               | 4.05                      |
| - Myocardial infarction                       | 6               | 3.47                      |
| - Metastatic malignancy                       | 5               | 2.89                      |
| - Connective tissue disorder                  | 5               | 2.89                      |
| - Hemiplegia                                  | 2               | 1.16                      |
| - Moderate liver disease                      | 1               | 0.58                      |

**Table S1. Patient characteristics. Related to Figures 1 and S1.**

| <b>Parameter</b> | <b>Unit</b>    | <b>Range</b> | <b>Higher/Lower</b> | <b>Cut-off</b> |
|------------------|----------------|--------------|---------------------|----------------|
| AP               | U/l            | 40 – 129     | Higher              | 232            |
| ASAT             | U/l            | 10 – 50      | Higher              | 90             |
| GGT              | U/l            | > 65         | Higher              | 117            |
| Lymphocytes      | Billion/l      | 1.1 – 3.4    | Lower               | 0.66           |
| B cells          | Cells/ $\mu$ l | 80 – 500     | Lower               | 48             |
| CD4+ T cells     | Cells/ $\mu$ l | 500 – 1350   | Lower               | 300            |
| Platelets        | Billion/l      | 150 – 400    | Lower               | 90             |

**Table S5. COST score. Related to Figure 7.**

**Table S6. Antibodies used for flowcytometric staining. Related to all Figures including immune cell phenotyping.**

Lymphocyte subpopulations:

| Fluorochrome                   | Antigen   | Clone             | Catalog No. | Supplier       |
|--------------------------------|-----------|-------------------|-------------|----------------|
| Multitest 6-color TBNK Reagent |           |                   | 644611      | BD Biosciences |
| FITC                           | CD3       | SK7               |             |                |
| PE                             | CD16/CD56 | B73.1 / NCAM 16.2 |             |                |
| PerCP-Cy5.5                    | CD45      | 2D1 (HLe-1)       |             |                |
| PE-Cy7                         | CD4       | SK3               |             |                |
| APC                            | CD19      | SJ25C1            |             |                |
| APC-Cy7                        | CD8       | SK1               |             |                |

Regulatory T cells:

| Fluorochrome | Antigen | Clone      | Catalog No. | Supplier       |
|--------------|---------|------------|-------------|----------------|
| FITC         | CD25    | M-A251     | 356106      | BioLegend      |
| PE           | CD127   | HIL-7R-M21 | 557938      | BD Biosciences |
| APC          | CD4     | SK3        | 345771      | BD Biosciences |

B cell subsets:

| Fluorochrome | Antigen | Clone  | Catalog No. | Supplier       |
|--------------|---------|--------|-------------|----------------|
| FITC         | CXCR3   | G025H7 | 353704      | BioLegend      |
| PE           | HLA-DR  | L243   | 307606      | BioLegend      |
| PerCP-Cy5.5  | CD38    | HIT2   | 303522      | BioLegend      |
| PE-Cy7       | CD21    | Bu32   | 354912      | BioLegend      |
| APC          | CD10    | HI10a  | 312210      | BioLegend      |
| APC-Cy7      | CD19    | HIB19  | 302218      | BioLegend      |
| BV421        | CD73    | AD2    | 562430      | BD Biosciences |
| BV500        | CD27    | O323   | 302835      | BioLegend      |

Myeloid subsets:

| Fluorochrome | Antigen   | Clone          | Catalog No.   | Supplier  |
|--------------|-----------|----------------|---------------|-----------|
| FITC         | CD303     | 201A           | 354208        | BL        |
| PE           | CD123     | 6H6            | 306006        | BL        |
| PerCP-Cy5.5  | CD16      | B73.1          | 360712        | Biolegend |
| PE-Cy7       | HLA-DR    | L243           | 307616        | Biolegend |
| AF647        | P2X7      | L4             | -/-           | own*      |
| APC-Cy7      | CD2; CD19 | RPA-210; HIB19 | 300220;302218 | Biolegend |
| BV421        | CD11c     | 3.9            | 565806        | BD        |
| BV500        | CD14      | MSE2           | 301842        | Biolegend |

\* purified from hybridoma supernatant
